# 1 **Transgenerational developmental effects of immune priming in the red** 2 **flour beetle *Tribolium castaneum***

3 **Nora KE Schulz<sup>1</sup>, Marie Pauline Sell<sup>1,2</sup>, Kevin Ferro<sup>1,3</sup>, Nico Kleinhöling<sup>1</sup>, Joachim Kurtz<sup>1\*</sup>**

4 <sup>1</sup> Institute for Evolution and Biodiversity, University of Münster, Münster, Germany

5 **\* Correspondence:**

6 Joachim Kurtz

7 [joachim.kurtz@uni-muenster.de](mailto:joachim.kurtz@uni-muenster.de)

8 <sup>2</sup> Present address: Max Planck Institute for Chemical Ecology, Jena, Germany

9 <sup>3</sup> Present address: Department of Entomology, University of Arizona, Tucson, USA

10 **Keywords: innate immunity, immune priming, transgenerational effects, *Tribolium castaneum*,**  
11 ***Bacillus thuringiensis*, host parasite co-evolution, bacterial infection, oral infection.**

12 Words: 5977

13 Figures: 6

## 14 **Abstract**

15 Immune priming, the increased chance to survive a secondary encounter with a pathogen, has been  
16 described for many invertebrate species, which lack the classical adaptive immune system of  
17 vertebrates. Priming can be specific even for closely related bacterial strains, last up to the entire  
18 lifespan of an individual, and in some species, it can also be transferred to the offspring and is then  
19 called transgenerational immune priming (TGIP). In the red flour beetle *Tribolium castaneum*, a pest  
20 of stored grains, TGIP has even been shown to be transferred paternally after injection of adult  
21 beetles with heat-killed *Bacillus thuringiensis*.

22 Here we studied whether TGIP in *T. castaneum* is also transferred to the second filial generation,  
23 whether it can also occur after oral and injection priming of larvae and whether it has effects on  
24 offspring development. We found that paternal priming with *B. thuringiensis* does not only protect  
25 the first but also the second offspring generation. Also, fitness costs of the immune priming became  
26 apparent, when the first filial generation produced fewer offspring. Furthermore, we used two  
27 different routes of exposure to prime larvae, either by injecting them with heat-killed bacteria or  
28 orally feeding them *B. thuringiensis* spore culture supernatant. Neither of the parental larval priming  
29 methods led to any direct benefits regarding offspring resistance. However, the injections slowed  
30 down development of the injected individuals, while oral priming with both a pathogenic and a non-  
31 pathogenic strain of *B. thuringiensis* delayed offspring development.

32 The long-lasting transgenerational nature of immune priming and its impact on offspring  
33 development indicate that potentially underlying epigenetic modifications might be stable over  
34 several generations. Therefore, this form of phenotypic plasticity might impact pest control and  
35 should be considered when using products of bacterial origin against insects.

## 36 **1 Introduction**

37 Over the last decade a wealth of new evidence has been put forward to demonstrate that invertebrate  
38 immune systems can possess forms of immune memory and are sometimes capable of highly specific  
39 responses (Cooper and Eleftherianos 2017; Milutinović and Kurtz 2016; Contreras-Garduño et al.  
40 2016). The phenomenon enabling a stronger and faster immune response upon secondary infection  
41 has been termed immune priming and shows parallels in memory and specificity to trained immunity  
42 of vertebrates (Little and Kraaijeveld 2004; Kurtz and Armitage 2017; Kurtz 2005; Netea et al. 2011;  
43 Melillo et al. 2018). The trigger, specificity and duration of the priming can be extremely diverse. It  
44 has been shown that immune priming can be successful against bacteria (Roth et al. 2009), fungi  
45 (Fisher and Hajek 2015; Gálvez and Chapuisat 2014) and viruses (Tidbury, Pedersen, and Boots  
46 2011). Immune priming can be achieved by introducing a sublethal dose of the parasite, an  
47 incapacitated, *e.g.* heat killed agent or using only specific molecules from the original pathogen, *e.g.*  
48 lipopolysaccharides (Milutinović and Kurtz 2016; Contreras-Garduño et al. 2016). Also, the route  
49 how the elicitor is introduced can vary, similar to differences in the route of infection in nature. For  
50 experiments involving priming, the priming agent is most commonly introduced via septic wounding  
51 and deposition into the haemocoel or orally via feeding (Milutinović and Kurtz 2016). Furthermore,  
52 also abiotic factors, *e.g.* thermal exposure have been shown to prompt this phenomenon (Wojda and  
53 Taszłow 2013; Eggert et al. 2015). Immune priming can be cross-reactive in some cases (Moret and  
54 Siva-Jothy 2003), while in others the host's primed immune response can differentiate between  
55 bacterial species or even strains, mounting the best protection when the same pathogen is  
56 encountered twice (Roth et al. 2009; Medina Gomez et al. 2018).

57 Additionally, the duration of immune priming effects differs dramatically. In some cases, protection  
58 lasts across different life stages and throughout the entire life span of an individual (Thomas and  
59 Rudolf 2010; Khan et al. 2016; Pham et al. 2007). In some cases, the immune priming is even  
60 transferred to the offspring generation (Milutinović and Kurtz 2016; Roth et al. 2018; Dhinaut et al.  
61 2018). This transgenerational immune priming (TGIP) can occur through either parent. While for the  
62 maternal side, the direct transfer of bacterial particles bound to egg-yolk protein vitellogenin has been  
63 shown to be involved in certain systems (Salmela et al. 2015), the detailed mechanistic underpinnings  
64 of immune priming in general and paternal TGIP in particular still remain to be discovered  
65 (Milutinović et al. 2016). It has been considered that epigenetic mechanisms, including DNA  
66 methylation, histone acetylation and miRNAs are involved (Vilcinskas 2016; Eggert et al. 2014).

67 As with any other immune response also the fitness costs of immune priming including those for  
68 storing the information have to be considered. These costs are not constraint to a direct reduction in  
69 fertility but can also become visible in delayed development or smaller body mass if the priming  
70 occurs before the organism reaches maturity. Furthermore, negative effects might only become  
71 visible in the offspring generation. In the Coleopteran, *Tenebrio molitor*, maternal priming prolonged  
72 offspring larval development (Zanchi et al. 2011) and the strength of this effect depended on the  
73 Gram type of the bacteria used for priming (Dhinaut et al. 2018). Immune priming beneficial to the  
74 mother can even increase offspring susceptibility to the same parasite (Vantaux et al. 2014). These  
75 are all factors demonstrating the complexity of immune priming and showing that this term probably  
76 covers several distinct (Pradeu and Du Pasquier 2018). It makes predicting host-parasite co-evolution  
77 and the emergence of resistance against bacterial pesticides much more difficult if we consider that  
78 several forms of immune priming can occur in the same species across different life stages and  
79 generations with different consequences.

80 Immune priming has intensively been studied in the red flour beetle *Tribolium castaneum*, which is a  
81 widely abundant pest of stored grains. In this beetle, immune priming has been demonstrated in  
82 different life stages, *i.e.* larvae and adults, as well as within and across generations (Milutinović et al.

83 2016). In this species, immune priming can be highly specific, down to the bacterial strain and can be  
84 passed on via both parents (Roth et al. 2009; Roth et al. 2010). Two different routes of priming and  
85 infection were used. Oral infections with spores only work in larvae and the protective benefits of  
86 priming with the supernatant of the spore culture have so far only been studied within generation,  
87 mostly even within life stage (Milutinović et al. 2014; Futo et al. 2017; Greenwood et al. 2017).  
88 Therefore, the effectiveness of the priming was only confirmed for a few days after exposure. The  
89 other priming and infection method uses vegetative cells, which are inactivated for the priming and  
90 are directly introduced into the body cavity via septic wounding (Tate et al. 2017; Khan et al. 2016;  
91 Milutinović et al. 2016). In this case, immune priming of adults can be transferred to their offspring  
92 and a protection against infection can still be observed in the adults of the offspring generation (Roth  
93 et al. 2010; Eggert et al. 2014). But, these different priming techniques and routes of infection lead to  
94 different responses as is evident in differential gene expression and immune system activity (Behrens  
95 et al. 2014). The pathogen used in most studies of priming in *T. castaneum* is the entomopathogenic  
96 and endospore forming bacterium *Bacillus thuringiensis* (Jurat-Fuentes and Jackson 2012). Proteins  
97 from *B. thuringiensis*, so-called Cry toxins are widely used for their insecticidal activity in transgenic  
98 crops (Lacey et al. 2015; Pardo-López et al. 2013). Therefore, the study of immune priming in this  
99 host parasite model system does not only advance basic research and our understanding of the  
100 invertebrate immune system but is also helpful for applied approaches and improving insect control  
101 strategies.

102 With our study we shed further light on the different forms of immune priming against  
103 *B. thuringiensis* that can be observed in *T. castaneum*. We here investigated the transgenerational  
104 effects caused by three different types of priming, *i.e.* priming by injection of larvae and male adults  
105 and oral priming of larvae by monitoring the development, fitness and survival of bacterial infection  
106 (challenge). As paternal TGIP so far has only been tested in the first offspring generation (Roth et al.  
107 2010), we here expanded the experimental time frame to include the adult grandparental generation,  
108 investigating whether TGIP is a multigenerational phenomenon extended to more than one  
109 subsequent generation. Studies on larval priming have been mainly focused on within generation  
110 immune benefits (Milutinović et al. 2016). We therefore here wanted to investigate whether larval  
111 TGIP via the oral or septic wounding infection route exists and whether the offspring is affected in a  
112 different way by parental treatment.

## 113 2 Materials and Methods

### 114 2.1 Model organisms

115 Beetles were derived from a population originally collected in the wild in Croatia in 2010 (Milutinović  
116 et al. 2013). Until the start of the experiment, beetles were kept in populations of more than 2,000  
117 individuals in plastic boxes with heat sterilized (75 °C) organic wheat flour (type 550) enriched with 5  
118 % brewer's yeast. Standard breeding conditions were set at 70 % humidity and 30 °C with a 12 h  
119 light/dark cycle.

120 In all priming treatments and infections, different entomopathogenic gram-positive *B. thuringiensis*  
121 strains were used. *B. thuringiensis* and its Cry toxins are widely used as insecticides and together  
122 with *T. castaneum* form a well-established system to study host parasite co-evolution (Roth et al.  
123 2009; Milutinović et al. 2013; Contreras et al. 2013; Pardo-López et al. 2013). For priming and  
124 challenge by injection we used vegetative cells from *B. thuringiensis* (*Bt*) strain DSM 2046 (German  
125 Collection of Microorganisms and Cell Cultures, DSMZ). For the treatments concerning priming and  
126 infection by oral uptake, spores and supernatant from *Bt morrisoni* *bv. tenebrionis* spore cultures (*Btt*,

127 Bacillus Genetic Stock Center, Ohio State University, Ohio, USA) were used. Additionally,  
128 *Bt407cry<sup>-</sup>* (*Bt407*, kindly provided by Dr. Christina Nielsen-Leroux, Institute National de la  
129 Recherche Agronomique, La Minière, 78285 Guyancourt Cedex, France) served as a negative control  
130 in the oral priming experiment, as it does not produce Cry toxins and does not lead to immune  
131 priming nor mortality upon ingestion (Milutinović et al. 2013; Milutinović et al. 2014).

## 132 **2.2 TGIP in adults**

133 In this experiment we wanted to investigate, whether paternal TGIP persists past the first filial ( $F_1$ )  
134 generation (Roth et al. 2010; Eggert et al. 2014) and therefore provides survival advantages upon *Bt*  
135 infection to the second filial ( $F_2$ ) generation. Additionally, we measured the fertility of the primed  
136 males and their offspring to determine potential costs of TGIP. For an overview of the experimental  
137 design see Figure 1.

### 138 **2.2.1 Priming of the parental ( $P_0$ ) generation**

139 To set up the  $P_0$  generation for this experiment around 2000 beetles from a general stock population  
140 were put into a plastic box containing 250 g of flour with yeast. After an oviposition period of 24 h  
141 the adults were sieved off and put into a new box for a second 24 h oviposition period. When the  
142 offspring had reached the pupal stage, their sex was determined, and all beetles were kept  
143 individually from here on onwards.

144 For the priming injections one week after eclosion, 60 male adults were either injected with heat-  
145 killed *Bt* suspended in PBS at a concentration of  $1 \cdot 10^9$  cells per ml, PBS only to control for the  
146 wounding or left naïve. The priming suspension was directly injected into the dorsal vessel by  
147 dorsally puncturing the epidermis between head and pronotum in a flat angle to minimize tissue  
148 damage. Heat-killed *Bt* were produced from an overnight culture as previously described (Roth et al.  
149 2009; Ferro et al. 2017). A nanoinjector (Drummond Nanoject II) was used for this procedure with  
150 the injection volume set to 18.4 nl ( $\sim 20,000$  cells per injection in the *Bt* treatment). Survival after the  
151 priming procedure was recorded 24 h later.

### 152 **2.2.2 Mating and fitness of $P_0$ and $F_1$ generation**

153 Single mating pairs with naïve, virgin females were set up ( $n=39-57$ ). Mating pairs were kept in  
154 plastic vials containing 6 g of flour and left to lay eggs for two consecutive three-day long  
155 oviposition periods. Thirteen days after the end of the respective oviposition period, larvae were  
156 counted for each pair and individualized into 96 well plates with flour. For the analysis, data from  
157 both oviposition periods were combined.

158 The sex of the offspring was determined when they had reached the pupal stage. One female and one  
159 male offspring from each single pair formed a new mating pair to produce the  $F_2$  generation, leading  
160 to mating of full siblings ( $n=29-53$ ). Mating, oviposition and individualization of offspring larvae  
161 were carried out in the same way as described for the parental generation with the exception of the  
162 oviposition periods being shortened to 24 h. The fertility of  $F_1$  pairs was recorded as live larvae 12  
163 days post oviposition (dpo).

### 164 **2.2.3 Bacterial Challenge of adults of $F_1$ and $F_2$ generation**

165 The priming of adult males of *T. castaneum* with heat-killed *Bt* leads to an increased survival rate in  
166 their adult offspring when infected with a potentially lethal dose of the same bacteria (Eggert et al.  
167 2014). Whether this phenomenon is also transferred to subsequent generations has so far not been  
168 investigated. We therefore exposed individuals of the  $F_1$  and  $F_2$  generation to a bacterial challenge



169 after the P<sub>0</sub> generation had received a priming treatment. Bacteria were cultured, washed and their  
170 concentration in PBS adjusted as for the priming procedure without the heat-killing step (2.2.1). One  
171 week after eclosion animals of both sexes were injected with a volume of 18.4 nl. The injection either  
172 contained *Bt* cells at a concentration 10<sup>7</sup> vegetative bacterial cells per ml (~200 cells per injection) in  
173 PBS or only PBS as a control and was performed in the same manner as described for priming  
174 (2.2.1). A second control consisted of a naïve group that received no injections. In the F<sub>1</sub> generation,  
175 three adult siblings from each family were used, one for each challenge treatment (n=31-44). This  
176 was the same for the F<sub>2</sub> generation, but here the challenge was performed on adults originating from  
177 two consecutive ovipositions of the same families (oviposition 1: n=16-42, oviposition 2: n=24-45).  
178 Injections were carried out in the same manner as for the priming treatment (2.2.1). Afterwards, the  
179 beetles were kept in individual glass vials and their survival was recorded 24 h post challenge.

## 180 **2.3 Transgenerational effects of larval priming**

181 Within generation immune priming of *T. castaneum* larvae with *B. thuringiensis* can be achieved by  
182 two different infection routes, *i.e.* oral ingestion of spore conditioned supernatant or by the  
183 introduction of heat-killed vegetative cells into the hemolymph by pricking with a needle dipped in  
184 bacterial solution or direct injection (Behrens et al. 2014; Ferro et al. 2017). Here, we investigated  
185 whether priming via either of these infection routes affects fertility. For this, larvae from a 24 h  
186 oviposition period of our stock population were exposed to one of two oral treatments, one of two  
187 injection treatments or left naïve (for priming treatment details see 2.3.1 and 2.3.2). During the pupal  
188 stage the sex of the individuals was determined and once they had reached sexual maturity, single  
189 mating pairs were formed within each priming treatment (n=57-66). Pairs were allowed to mate and  
190 produce eggs for two consecutive 24 h oviposition periods. Afterwards, the adults were sieved off  
191 and offspring larvae were counted 14 dpo. For the analysis, data from both oviposition periods were  
192 combined.

193 Furthermore, we wanted to know whether the oral or injection immune priming of larvae can also be  
194 transferred to the F<sub>1</sub> generation, as has been observed in the priming of adult *T. castaneum* (Tate et  
195 al. 2017; Roth et al. 2010). To answer this, the following TGIP experiments on larvae were  
196 conducted applying oral and injection immune priming and challenge protocols. For an overview of  
197 the experimental design see Figure 1.

### 198 **2.3.1 Oral priming and challenge of larvae**

199 For the culturing and sporulation of *B. thuringiensis* we followed the method given in Milutinović *et*  
200 *al.* (2013). Milutinović *et al.* (2014) describe the methodology to orally prime larvae with *Bt* spore  
201 supernatant. In short, for the oral priming and challenge the spore supernatant or spores are provided  
202 to the beetle by mixing them with flour and PBS, pipetting the mixture into a 96 well plate and letting  
203 the diet dry to form flour discs. In addition to the *Btt* treatment, *Bt407* was used as a negative control  
204 in the priming and challenge procedure because the supernatant from its spore culture does not  
205 provide a priming effect nor do its spores cause mortality upon ingestion (Milutinović et al. 2014;  
206 Milutinović et al. 2013). As a third group a naïve control was included with pure PBS to produce the  
207 flour discs.

208 The P<sub>0</sub> generation originated from approximately 1000 beetles from our stock population ovipositing  
209 for 24 h. Larvae of the P<sub>0</sub> generation were exposed to the priming diets 14 dpo for 24 h (n=320).  
210 After the priming, a subgroup of the primed larvae was transferred onto naïve flour discs, on which  
211 they remained until the oral challenge. The within generation challenge was performed to confirm  
212 successful priming. The challenge took place 19 dpo, *i.e.* five days after the exposure to the priming

213 diet, in a full factorial design. Besides the challenge diet of *Btt* spores, two controls were included  
214 using either *Bt407* spores or flour discs prepared with pure PBS (n=40). The spore concentration was  
215 adjusted to  $5 \times 10^9$  spores per mL. Larvae stayed on their respective flour discs for the rest of the  
216 experiment. Survival after challenge was recorded daily for the next eight days.

217 As mentioned above, a subgroup of the F<sub>1</sub> generation was orally challenged as well. This group was  
218 produced by the mating of single pairs coming from the same priming group. One individual from  
219 each mating pair was used for each of the three challenge treatments (n=71-76). The challenge was  
220 conducted in a similar manner as for the P<sub>0</sub> generation, but without the naïve control. Instead it  
221 included two different spore concentrations to counteract the possibility of too high or too low  
222 mortality rates. The spore concentration was set to either  $1 \times 10^{10}$  spores per ml (high dose) or  $5 \times 10^9$   
223 spores per ml (low dose). Larvae were put on naïve flour discs at 14 dpo to ensure similar  
224 development as in the P<sub>0</sub> generation and avoid early pupation, as the development in loose flour is  
225 considerably faster than on flour discs. The challenge took place 19 dpo and again survival was  
226 monitored for eight days.

227 To determine potential costs of the immune priming, we monitored the development of the remaining  
228 individuals of the P<sub>0</sub> generation after priming that were not used in the challenge (*Btt* and *Bt407*:  
229 n=196, naïve: n=280) and their offspring produced from the mating pairs, which came from the same  
230 priming treatment (70-75). In the P<sub>0</sub>, pupation rates were monitored between 21 dpo and 25 dpo and  
231 the proportion of eclosed adults was recorded 27 dpo. The offspring larvae were individualized 14  
232 dpo and kept in loose flour the entire time. They were checked for pupation between 19 dpo and 23  
233 dpo and their eclosion rates were noted 28 dpo.

### 234 **2.3.2 Priming and challenge of larvae by bacterial injection**

235 Priming by injection of heat killed *Bt* cells took place 14 dpo. The larvae for this experiment came  
236 from a 24 h oviposition of ~1000 beetles from our stock population. The procedure also included an  
237 injection control in which only PBS was used and a naïve group (n=244). Heat-killed priming  
238 bacteria were produced as described above (2.2.1). Priming injections had a volume of 18.4 nl and were  
239 placed in a flat-angle laterally under the epidermis of the third-last segment using a nanoinjector  
240 (Drummond Nanoject II). The bacterial concentration was adjusted to  $1 \times 10^9$  cells per ml (~20,000  
241 cells per larvae). After the injection, larvae were kept individually in 96 well plates containing flour.

242 We performed a within generation injection challenge to confirm the success of the priming. During  
243 the bacterial challenge 19 dpo, *i.e.* five days post priming a subgroup of the animals was injected  
244 with 18.4 nl of either vegetative *Bt* cells at a concentration of  $1 \times 10^7$  cells per ml suspended in PBS or  
245 only PBS (n=48). Challenge injections were placed in the dorsal vessel at a flat angle dorsally under the  
246 epidermis of the first thoracic segment to minimize tissue damage. After the challenge injection, larvae  
247 were continued to be kept individually, and their survival was checked seven days later. This challenge  
248 procedure was performed on a subgroup of the F<sub>1</sub> generation in the same manner, which was produced  
249 from single pairs within the same priming group, which produced eggs for two consecutive 24 h periods  
250 (n=96). Again, survival was measured after seven days.

251 Also, for the injection priming, we wanted to test whether the treatment was costly and impacted the  
252 development. We therefore checked the proportion of pupae in a subgroup of the P<sub>0</sub> generation  
253 (n=196) 23 dpo and the proportion of eclosed adults in the F<sub>1</sub> generation (n=72-103) 27 dpo. The F<sub>1</sub>  
254 generation was produced from single mating pairs within a priming treatment and offspring larvae  
255 were individualized 14 dpo, *i.e.* the age their parents had been primed.

## 256 **2.4 Statistical analysis**

257 All statistical analyses were performed in R (R Development Core Team 2008) using RStudio  
258 (RStudio Team 2015). Additional packages utilized included: MASS (Venables and Ripley 2002),  
259 lme4 (Bates et al. 2015), multcomp (Hothorn et al. 2008) and survival (Therneau and Grambsch  
260 2000). Data concerning larval survival and development until pupation were tested in a Cox  
261 proportional hazard analysis, after it had been ensured that the assumption of hazards being  
262 proportional over time had been fulfilled. When this was not the case, generalized linear mixed  
263 effects models (GLMM) with a binomial distribution and experimental block as random factor were  
264 applied on data for one specific time point for pupation rates. This method was also used to examine  
265 eclosion rate. Tukey Honest Difference (THD) was applied *post hoc* to determine significant  
266 differences between individual treatment groups, while adjusting the p-values for multiple testing.  
267  $\chi^2$ -tests were used to analyze survival after injection challenge in cases for which random factors did  
268 not apply.

### 269 **3 Results**

#### 270 **3.1 Adult TGIP is transmitted to the F<sub>2</sub> generation**

271 We first wanted to confirm successful TGIP in the adults of the F<sub>1</sub> generation. Due to an unusually  
272 high death rate in the beetles injected only with buffer, we did not observe significant differences in  
273 mortality between the beetles exposed to bacteria (challenge) and the injection control regardless of  
274 paternal priming (N=232,  $\chi^2=0.707$ , p=0.4; Figure 2a). Within the *Bt* challenged group, there was a  
275 tendency towards effective TGIP, as we observed a trend towards increased survival in the group that  
276 had received the paternal priming treatment compared to the priming injection control (N=69,  
277  $\chi^2=3.401$ , p=0.065; Figure 2a). We did not see any difference between the priming treatments in  
278 response to challenge injection control (N=119,  $\chi^2=0.473$ , p=0.78; Figure 2a).

279 We then tested whether TGIP is also passed on to the successive generation. The challenge of the  
280 adult F<sub>2</sub> generation proved to be effective, as significantly more beetles died after injection with live  
281 bacteria than of those that received control injections (GLMM: df=1,  $\chi^2=23$ , p<0.001; Figure 2b).  
282 Furthermore, offspring, whose grandfathers had received a priming injection with heat-killed bacteria  
283 survived significantly better than those from the priming control group (GLMM: df=2,  $\chi^2=7.3$ ,  
284 p<0.05; THD: z=-2.492, p<0.05; Figure 2b). Survival in the naïve control did not differ significantly  
285 from the priming control (THD: z=-0.827, p=0.68), but there was a tendency towards higher  
286 mortality compared to the offspring of primed grandfathers (THD: z=-2.090, p=0.09; Figure 2b).  
287 Therefore, the previously described TGIP in *T. castaneum* is transmitted past the first offspring  
288 generation at a comparable strength to the F<sub>2</sub> generation.

289 We investigated possible costs of TGIP by counting live offspring two weeks after mating as a measure  
290 of reproductive success in the P<sub>0</sub> and F<sub>1</sub> generations. We could not observe any effect of parental  
291 priming treatment on fertility for the P<sub>0</sub> (GLM: df=2,  $\chi^2=3.399$ , p=0.18; Figure 3a) nor the F<sub>1</sub>  
292 generation (GLM: df=2,  $\chi^2=7.19$ , p<0.05; THD: priming control z=-0.527, p=0.86; naïve z=2.014,  
293 p=0.11, Figure 3b). However, the paternal priming control treatment significantly reduced fertility in  
294 the F<sub>1</sub> generation and led to significantly less F<sub>2</sub> larvae compared to the naïve control (THD: z= -2.381,  
295 p<0.05; Figure 3b). Therefore, paternal septic wounding but not paternal bacterial priming reduces the  
296 fitness of the F<sub>1</sub> generation.

#### 297 **3.2 Transgenerational effects of priming in larvae**

### 298 **3.2.1 Larval priming does not affect fertility**

299 Neither oral nor injection priming of larvae with spore supernatant or heat-killed bacteria,  
300 respectively, significantly affected fertility compared to the control groups or the naïve individuals  
301 (GLM:  $df=4$ ,  $X^2=2.11$ ,  $p=0.71$ , Figure S1).

### 302 **3.2.2 Oral priming affects development differently in treated and offspring generation**

303 We monitored larval development after oral priming to discover potential additional costs and  
304 benefits of this treatment besides changes in survival rate upon infection. In the treated parental  
305 generation, there were significant differences in the pupation rates 21 dpo to 25 dpo (  
306 **Figure 4a**). Larvae treated with *Bt407* supernatant, a bacterial strain that has been shown to not cause  
307 any immune priming (Milutinović et al. 2014) and therefore served as a priming control, reached  
308 pupation faster than the *Btt* primed group ( $z=-2.906$ ,  $p=0.0102$ ). There also was a trend towards  
309 earlier pupation of the *Bt407* treated larvae compared to the naïve control ( $z=-2.28$ ,  $p=0.059$ ), while  
310 the *Btt* primed group and naïve control did not differ ( $z=-0.875$ ,  $p=0.65$ ). Additionally, there were  
311 differences in time until adult eclosion (GLMM:  $df=2$ ,  $X^2=17.52$ ,  $p<0.001$ ;

312 **Figure 4b**). At 28 dpo significantly more pupae from the *Bt407* priming control had eclosed than  
313 from the *Btt* primed group ( $z=2.98$ ,  $p=0.008$ ) and the naïve control ( $z=3.802$ ,  $p<0.001$ ). Again, there  
314 was no difference between the *Btt* primed and naïve control ( $z=0.569$ ,  $p=0.84$ ).

315 We also observed the development in the  $F_1$  generation to see if this was influenced by the parental  
316 oral priming. Larvae, whose parents were exposed to spore culture supernatant from *Btt* or *Bt407*  
317 developed significantly slower than offspring of the naïve control (GLMM:  $df=2$ ,  $X^2=16.14$ ,  
318  $p<0.001$ ; *Bt407*:  $z=3.83$ ,  $p=0.002$ ; *Btt*:  $z=3.832$ ,  $p<0.001$ , Figure 5a). We found a similar effect for  
319 the development until adult eclosion, which on average was reached earliest by the naïve group  
320 (GLMM:  $df=2$ ,  $X^2=14.17$ ,  $p<0.001$ ; *Bt407*:  $z=-3.213$ ,  $p=0.004$ ; *Btt*:  $z=-3.199$ ,  $p=0.004$ ; Figure 5b)

### 321 **3.2.3 No survival benefits of oral TGIP for offspring generation**

322 To test whether the exposure to spore supernatants led to a trans-generational priming effect, *i.e.*  
323 increased offspring survival upon infection, larvae of the primed  $P_0$  and the  $F_1$  generation were orally  
324 exposed to spores. In the primed  $P_0$  generation, the challenge with *Btt* spores killed the larvae at a  
325 significantly higher rate than the exposure to spores of *Bt407*, which served as the treatment control  
326 ( $df=1$ ,  $X^2=12.76$ ,  $p<0.001$ ; Figure S2). This, however was regardless of priming treatment, which did  
327 not lead to any significant differences ( $df=2$ ,  $X^2=0.63$ ,  $p=0.73$ ; Figure S2). This might be attributed to  
328 overall relatively low mortality rate after challenge with only 10.8 % of all exposed larvae dying.  
329 This probably was caused by the rearing of larvae in lose flour instead of flour discs for the period  
330 between priming and challenge, because of which many larvae might have already had reached a pre-  
331 pupal stage and stopped feeding.

332 Although mortality was higher, results for the offspring generation were similar (Figure S3). Again,  
333 the bacterial challenge proved to cause significant mortality at high ( $df=1$ ,  $X^2=96.63$ ,  $p<0.001$ ) and  
334 low concentration of spores ( $df=1$ ,  $X^2=47.1$ ,  $p<0.001$ ). Furthermore, survival depended on *Btt* spore  
335 concentration as the higher dose led to significantly higher mortality ( $df=1$ ,  $X^2=10.85$ ,  $p<0.001$ ). But,  
336 no effect of parental priming was observed ( $df=2$ ,  $X^2=0.69$ ,  $p=0.71$ ; Figure S3).



### 337 3.2.4 Transgenerational effects of injection priming in larvae

338 In this part of the experiment we investigated potential effects of priming of larvae by injection on  
339 their development and the development of their offspring. Nine days after the priming, significantly  
340 less individuals from the control injection treatment had pupated compared to the naïve control  
341 ( $X^2=8.466$ ,  $p=0.003$ , Figure 6a). The addition of heat-killed bacteria to the injection reduced this  
342 effect, resulting in only a trend towards later pupation in the *Bt* priming treatment compared to the  
343 naïve control ( $X^2=3.74$ ,  $p=0.053$ , Figure 6a). There was no significant difference in the pupation rate  
344 between the *Bt* primed individuals and the injection control ( $X^2=1$ ,  $p=0.317$ , Figure 6a). In the  $F_1$   
345 offspring generation we did not observe any effect of parental priming on the developmental speed,  
346 as the eclosion rate was similar for all treatment groups at 27 dpo (GLMM:  $df=2$ ,  $X^2=4.62$ ,  $p=0.1$ ).

347 We challenged the parental and offspring generation by injecting a potentially lethal dose of *Bt* at 19  
348 dpo, i.e. five days after the priming procedures for the parental generation. As the majority of  
349 mortality occurred within 24 hours of the bacterial injection, we did not use survival curves in the  
350 analysis, but instead used the survival rate differences after seven days for our analysis.

351 In the  $P_0$  generation priming did not lead to differential survival after the injection challenge, which  
352 caused between 23 % and 27 % mortality ( $df=2$ ,  $X^2=0.291$ ,  $p=0.86$ ). Finally, in the  $F_1$  offspring  
353 generation, the bacterial injection challenge caused significantly higher mortality than the injection  
354 control (GLMM:  $df=1$ ,  $X^2=244$ ,  $p<0.001$ , Figure S4). However, also in this case parental priming did  
355 not significantly impact survival as there were no significant differences in mortality rates between  
356 the parentally primed group and the two controls (GLMM:  $df=2$ ,  $X^2=0.037$ ,  $p=0.98$ , Figure S4).

## 357 4 Discussion

358 *T. castaneum* is one of the rare species for which not only maternal but also paternal TGIP has been  
359 observed (Roth et al. 2010; Roth et al. 2018). It is therefore important to further study this  
360 phenomenon. One of the major open questions regarding paternal TGIP is, whether it is effective in  
361 more than one subsequent generation and can be considered to be multigenerational. Additionally, it  
362 is important to understand what the costs of TGIP are and if these are also transferred to later  
363 generations. We therefore carried out bacterial priming and challenge experiments across three  
364 generations using adult beetles.

365 We found that offspring of primed grandfathers survived a bacterial challenge significantly better  
366 than offspring of grandfathers, which had received a priming control injection. Thus, paternal TGIP  
367 is persistent for multiple generations at least until the  $F_2$  generation. Astonishingly, the survival  
368 advantage of the  $F_2$  generation was at a similar level as observed in previous experiments for the  
369 direct offspring (Eggert et al. 2014). We therefore did not see any dilution effect of this phenomenon  
370 over subsequent generation. Furthermore, we witnessed indirect costs, not of TGIP itself, but of the  
371 wounding procedure during the injection. These fitness costs became only visible after two  
372 generations, when the offspring of fathers from the injection control group sired significantly less  
373 offspring. In the present experiment, in contrast to previous studies (Roth et al. 2010; Eggert et al.  
374 2014), were unable to detect a significant priming effect in the adult  $F_1$  offspring after paternal  
375 priming. This was likely due to an unusually high mortality in the injection control, maybe caused by  
376 a bacterial contamination in the injection buffer that was used for all treatments, thereby reducing a  
377 potential effect of priming.

378 Few studies have investigated the effects of TGIP beyond the first offspring generation. It has been  
379 shown that viral silencing agents derived from an RNAi response can be inherited non-genetically

380 from either parent and passed on for several generations (Rechavi et al. 2011). In parthenogenetic  
381 *Artemia*, maternal exposure to bacteria provided the offspring with a survival benefit of bacterial  
382 infection for all three tested offspring generations (Norouzitallab et al. 2015). Multigenerational  
383 effects of paternal TGIP have been described in the pipefish, where due to male pregnancy contact  
384 between father and offspring is much more pronounced than in our system (Beemelmanns and Roth  
385 2017). Although, we are as of today unaware of the mechanisms behind paternal TGIP against  
386 bacteria, we can assume that its multigenerational nature will strongly impact the evolution of  
387 resistance and tolerance, depending on the costs, benefits and specificity of TGIP and the prevalence  
388 of and therefore chances of repeated exposure to a parasite.

389 In the second part of this study, we investigated the transgenerational impact of immune priming via  
390 two different infection routes in larvae, for which within life stage immune priming has been  
391 previously demonstrated (Roth et al. 2009; Milutinović et al. 2014). Additionally to the survival after  
392 bacterial challenge, we monitored fitness costs of larval priming, becoming apparent as either directly  
393 reduced fertility or by slowing down developmental speed of the treated individual or its offspring.  
394 As any form of immunity, also immune priming comes at a cost for the organism (Sadd and Schmid-  
395 Hempel 2009; Schmid-Hempel 2005; Freitak et al. 2009). While in mosquitos a trade-off between  
396 immune priming and egg production has been observed (Contreras-Garduño et al. 2014), we did not  
397 find any effects of priming on fertility. Similar numbers of live offspring were produced across all  
398 treatments for both priming methods. But we estimated fertility only from a short 48h reproduction  
399 period and do not know how the immune priming might affect lifetime reproductive success. Also,  
400 we provided the beetle with *ad libitum* food throughout the experiment, whereas limiting resources  
401 can be necessary for uncovering trade-offs with immunity (Kutzer and Armitage 2016; Moret and  
402 Schmid-Hempel 2000).

403 However, the oral priming of larvae led to differential speed in their development. Larvae, which had  
404 received the priming control diet containing the supernatant from the *Bt407* culture reached pupation  
405 considerably faster and emerged as adults earlier. In contrast, the treatment with *Btt* did not lead to  
406 differential developmental time compared to the naïve larvae. The same effect was observed  
407 previously by Milutinović et al. (2014). It is possible that the supernatant from the *Bt407* control  
408 culture contained some nutrients that were transferred to the priming diet and helped the larvae to  
409 speed up their development. The supernatant from the treatment *Btt* culture might not contain these  
410 nutrients, due to differences in the bacteria. Alternatively, the necessity to mount an immune and  
411 priming response, brought on by the exposure to the priming diet might mitigate the potential effect  
412 of the additional nutrients.

413 In the offspring generation, development was strongly affected by parental larval treatment. Both,  
414 offspring from the *Btt* primed group and the *Bt407* priming control took longer to pupate and also  
415 emerge as adults. This is interesting because although *Bt407* does neither provide an immune priming  
416 (Milutinović et al. 2014) nor is able to kill larvae upon ingestion (Milutinović et al. 2013), larvae  
417 feeding on its spore supernatant still suffer these fitness costs. These results are in concordance with  
418 observations in the mealworm beetle, where maternal priming prolonged larval development, while  
419 paternal priming led to a reduction in larval body mass (Zanchi et al. 2011). For the injection  
420 priming, we only observed within generation effects on the development. Here the wounding by the  
421 injection was sufficient to cause the effect, because larval development was slowed down in the  
422 injection of heat-killed bacteria as well as in the injection control treatment compared to the naïve  
423 group. In the offspring generation, time until adult emergence was not affected by parental priming.  
424 So far, we have no data regarding the development until pupation in this case.

425 Increased developmental time during the larval and pupal stage can be considered a fitness cost.  
426 Longer time spend during the larval stage is costly as it increases several risks. During the larval  
427 stage the risk of infection is higher as only larvae can be infected orally with certain bacteria,  
428 including *Btt*. Also, there is a higher risk of cannibalism, which happens regularly among larva  
429 (Ichikawa and Kurauchi 2009) and at high densities smaller larvae might be less able to secure  
430 sufficient food (Koella and Boëte 2002). Therefore, prolonged development should decrease  
431 probability of survival and delay the start of reproduction. In this experiment we were unable to  
432 confirm within-generation immune priming for either of the two used infection methods. This can  
433 likely be attributed to the low overall mortality rates following the challenge, which is a problem  
434 occasionally encountered in such experiments (see also Tate et al. 2017). However, both within-  
435 generation priming methods have been shown to work consistently in our lab (Milutinović et al.  
436 2014; Ferro et al. 2017; Futo et al. 2017).

437 We did not find any evidence of larval TGIP with the oral nor the injection protocol. For larval  
438 priming by septic wounding with a pricking needle, it was observed that TGIP in larvae only  
439 occurred in populations, which do not demonstrate within life stage immune priming (Khan et al.  
440 2016), implying that they are incapable of developing and maintaining both forms of immune  
441 protection. As beetles from our population have repeatedly been shown to possess larval within life  
442 stage priming ability, this is a possible explanation for the absence of larval TGIP.

443 In conclusion, we observed that different ways of immune priming can have different effects on the  
444 next generation, depending on the life stage and route of priming. These effects might not always be  
445 beneficial, as parental treatment appeared to impact on offspring development, demonstrating  
446 potential costs of immune priming that are paid by the next generation. These would remain  
447 undetected if only the treated generation is studied. We therefore do not only need more studies on  
448 mechanisms behind the different routes of immune priming, but also more experimental research  
449 focusing on the evolutionary consequences of immune priming. This will help to clarify under which  
450 circumstances this ability is favored over the evolution of resistance or tolerance (Tidbury et al. 2012;  
451 Tate 2017). Such knowledge will be needed to advance methods of pest control, which strongly  
452 depend on the use of bacterial products, e.g. toxins from *B. thuringiensis*.

## 453 **5 Conflict of Interest**

454 The authors declare that the research was conducted in the absence of any commercial or financial  
455 relationships that could be construed as a potential conflict of interest.

## 456 **6 Author Contributions**

457 All authors contributed to the conception and design of the study; NS, MPS, KF and NK performed  
458 the experimental work; NS performed the statistical analysis and drafted the manuscript. All authors  
459 contributed to manuscript revision and read and approved the submitted version.

## 460 **7 Funding**

461 We are grateful for the financial support provided to MPS and JK by the DFG grant KU 1929/8-1  
462 within the DFG priority program 1819 “Rapid adaptations” and the DFG grant KU 1929/4-2 to KF  
463 and JK within the DFG priority program 1399 “Host-parasite coevolution.”

## 464 **8 Acknowledgments**

465 We wish to thank Kathrin Brüggemann und Anna Hübenthal for their help with the experiments. We  
466 thank Sina Flügge for providing us with drawings of *T. castaneum*.

## 467 **9 References**

- 468 Bates, Douglas, Martin Mächler, Ben Bolker, and Steve Walker. 2015. "Fitting Linear Mixed-Effects  
469 Models Using Lme4." *Journal of Statistical Software* 67 (1): 1–48. doi:10.18637/jss.v067.i01.
- 470 Beemelmans, Anne, and Olivia Roth. 2017. "Grandparental Immune Priming in the Pipefish  
471 *Syngnathus Typhle*." *BMC Evolutionary Biology* 17 (1): 44. doi:10.1186/s12862-017-0885-3.
- 472 Behrens, Sarah, Robert Peuß, Barbara Milutinović, Hendrik Eggert, Daniela Esser, Philip Rosenstiel,  
473 Hinrich Schulenburg, Erich Bornberg-Bauer, and Joachim Kurtz. 2014. "Infection Routes  
474 Matter in Population-Specific Responses of the Red Flour Beetle to the Entomopathogen  
475 *Bacillus Thuringiensis*." *BMC Genomics* 15 (1). doi:10.1186/1471-2164-15-445.
- 476 Contreras-Garduño, Jorge, Humberto Lanz-Mendoza, Bernardo Franco, Adriana Nava, Mario  
477 Pedraza-Reyes, and Jorge Canales-Lazcano. 2016. "Insect Immune Priming: Ecology and  
478 Experimental Evidences." *Ecological Entomology* 41 (4): 351–66. doi:10.1111/een.12300.
- 479 Contreras-Garduño, Jorge, M.C. Rodríguez, M.H. Rodríguez, A. Alvarado-Delgado, and Humberto  
480 Lanz-Mendoza. 2014. "Cost of Immune Priming within Generations: Trade-off between  
481 Infection and Reproduction." *Microbes and Infection* 16 (3): 261–67.  
482 doi:10.1016/j.micinf.2013.11.010.
- 483 Contreras, Estefanía, Carolina Rausell, and M. Dolores Real. 2013. "Proteome Response of  
484 *Tribolium Castaneum* Larvae to *Bacillus Thuringiensis* Toxin Producing Strains." *PLoS ONE* 8  
485 (1): e55330. doi:10.1371/journal.pone.0055330.
- 486 Cooper, Dustin, and Ioannis Eleftherianos. 2017. "Memory and Specificity in the Insect Immune  
487 System: Current Perspectives and Future Challenges." *Frontiers in Immunology* 8: 539.  
488 doi:10.3389/fimmu.2017.00539.
- 489 Dhinaut, Julien, Manon Chogne, and Yannick Moret. 2018. "Immune Priming Specificity within and  
490 across Generations Reveals the Range of Pathogens Affecting Evolution of Immunity in an  
491 Insect." *Journal of Animal Ecology* 87 (2): 448–63. doi:10.1111/1365-2656.12661.
- 492 Eggert, Hendrik, Maike F. Diddens-de Buhr, and Joachim Kurtz. 2015. "A Temperature Shock Can  
493 Lead to Trans-Generational Immune Priming in the Red Flour Beetle, *Tribolium Castaneum*."  
494 *Ecology and Evolution* 5 (6): 1318–26. doi:10.1002/ece3.1443.
- 495 Eggert, Hendrik, Joachim Kurtz, and Maike F. Diddens-de Buhr. 2014. "Different Effects of Paternal  
496 Trans-Generational Immune Priming on Survival and Immunity in Step and Genetic Offspring."  
497 *Proceedings of the Royal Society B: Biological Sciences* 281 (1797).  
498 doi:10.1098/rspb.2014.2089.
- 499 Ferro, Kevin, Diana Ferro, Francesca Corrà, Rigers Bakiu, Gianfranco Santovito, and Joachim Kurtz.  
500 2017. "Cu,Zn Superoxide Dismutase Genes in *Tribolium Castaneum*: Evolution, Molecular  
501 Characterisation, and Gene Expression during Immune Priming." *Frontiers in Immunology* 8  
502 (DEC): 1–11. doi:10.3389/fimmu.2017.01811.



- 503 Fisher, Joanna J., and Ann E. Hajek. 2015. "Maternal Exposure of a Beetle to Pathogens Protects  
504 Offspring against Fungal Disease." *PLOS ONE* 10 (5): e0125197.  
505 doi:10.1371/journal.pone.0125197.
- 506 Freitak, Daliel, David G Heckel, and Heiko Vogel. 2009. "Dietary-Dependent Trans-Generational  
507 Immune Priming in an Insect Herbivore." *Proceedings of the Royal Society B: Biological  
508 Sciences* 276 (1667): 2617–24. doi:10.1098/rspb.2009.0323.
- 509 Futo, Momir, Marie P Sell, Megan A M Kutzer, and Joachim Kurtz. 2017. "Specificity of Oral  
510 Immune Priming in the Red Flour Beetle *Tribolium Castaneum*." *Biology Letters* 13 (12).  
511 doi:10.1098/rsbl.2017.0632.
- 512 Gálvez, Dumas, and Michel Chapuisat. 2014. "Immune Priming and Pathogen Resistance in Ant  
513 Queens." *Ecology and Evolution* 4 (10): 1761–67. doi:10.1002/ece3.1070.
- 514 Greenwood, Jenny M., Barbara Milutinović, Robert Peuß, Sarah Behrens, Daniela Esser, Philip  
515 Rosenstiel, Hinrich Schulenburg, and Joachim Kurtz. 2017. "Oral Immune Priming with  
516 *Bacillus Thuringiensis* Induces a Shift in the Gene Expression of *Tribolium Castaneum* Larvae."  
517 *BMC Genomics* 18 (1): 329. doi:10.1186/s12864-017-3705-7.
- 518 Hothorn, Torsten, Frank Bretz, and Peter Westfall. 2008. "Simultaneous Inference in General  
519 Parametric Models." *Biometrical Journal* 50 (3): 346–63. doi:10.1002/bimj.200810425.
- 520 Ichikawa, Toshio, and Toshiaki Kurauchi. 2009. "Larval Cannibalism and Pupal Defense against  
521 Cannibalism in Two Species of Tenebrionid Beetles." *Zoological Science* 26 (8): 525–29.  
522 doi:10.2108/zsj.26.525.
- 523 Jurat-Fuentes, Juan Luis, and Trevor A. Jackson. 2012. "Bacterial Entomopathogens." *Insect  
524 Pathology*, January, 265–349. doi:10.1016/B978-0-12-384984-7.00008-7.
- 525 Khan, Imroze, Arun Prakash, and Deepa Agashe. 2016. "Divergent Immune Priming Responses  
526 across Flour Beetle Life Stages and Populations." *Ecology and Evolution* 6 (21): 7847–55.  
527 doi:10.1002/ece3.2532.
- 528 Koella, Jacob C., and Christophe Boëte. 2002. "A Genetic Correlation between Age at Pupation and  
529 Melanization Immune Response of the Yellow Fever Mosquito *Aedes Aegypti*." *Evolution* 56  
530 (5): 1074–79. doi:10.1111/j.0014-3820.2002.tb01419.x.
- 531 Kurtz, Joachim. 2005. "Specific Memory within Innate Immune Systems." *Trends in Immunology* 26  
532 (4): 186–92. doi:10.1016/j.it.2005.02.001.
- 533 Kurtz, Joachim, and Sophie A. O. Armitage. 2017. "Dissecting the Dynamics of Trans-Generational  
534 Immune Priming." *Molecular Ecology* 26 (15): 3857–59. doi:10.1111/mec.14190.
- 535 Kutzer, Megan A. M., and Sophie A. O. Armitage. 2016. "The Effect of Diet and Time after  
536 Bacterial Infection on Fecundity, Resistance, and Tolerance in *Drosophila Melanogaster*."  
537 *Ecology and Evolution* 6 (13): 4229–42. doi:10.1002/ece3.2185.
- 538 Lacey, L.A., D. Grzywacz, D.I. Shapiro-Ilan, R. Frutos, M. Brownbridge, and M.S. Goettel. 2015.  
539 "Insect Pathogens as Biological Control Agents: Back to the Future." *Journal of Invertebrate*

- 540 *Pathology* 132 (November): 1–41. doi:10.1016/j.jip.2015.07.009.
- 541 Little, Tom J., and Alex R. Kraaijeveld. 2004. “Ecological and Evolutionary Implications of  
542 Immunological Priming in Invertebrates.” *Trends in Ecology & Evolution* 19 (2): 58–60.  
543 doi:10.1016/J.TREE.2003.11.011.
- 544 Medina Gomez, Héctor, Galia Adame Rivas, Angélica Hernández-Quintero, Angélica González  
545 Hernández, Juan Carlos Torres Guzmán, Humberto Lanz Mendoza, and Jorge Contreras-  
546 Garduño. 2018. “The Occurrence of Immune Priming Can Be Species-Specific in  
547 Entomopathogens.” *Microbial Pathogenesis* 118 (May): 361–64.  
548 doi:10.1016/j.micpath.2018.03.063.
- 549 Melillo, Daniela, Rita Marino, Paola Italiani, and Diana Boraschi. 2018. “Innate Immune Memory in  
550 Invertebrate Metazoans: A Critical Appraisal.” *Frontiers in Immunology* 9 (August): 1915.  
551 doi:10.3389/fimmu.2018.01915.
- 552 Milutinović, Barbara, Svenja Fritzlar, and Joachim Kurtz. 2014. “Increased Survival in the Red Flour  
553 Beetle after Oral Priming with Bacteria-Conditioned Media.” *Journal of Innate Immunity* 6 (3):  
554 306–14. doi:10.1159/000355211.
- 555 Milutinović, Barbara, and Joachim Kurtz. 2016. “Immune Memory in Invertebrates.” *Seminars in*  
556 *Immunology* 28 (4): 328–42. doi:10.1016/j.smim.2016.05.004.
- 557 Milutinović, Barbara, Robert Peuß, Kevin Ferro, and Joachim Kurtz. 2016. “Immune Priming in  
558 Arthropods: An Update Focusing on the Red Flour Beetle.” *Zoology* 119 (4): 254–61.  
559 doi:10.1016/j.zool.2016.03.006.
- 560 Milutinović, Barbara, Clemens Stolpe, Robert Peuß, Sophie A.O. Armitage, and Joachim Kurtz.  
561 2013. “The Red Flour Beetle as a Model for Bacterial Oral Infections.” *PLoS ONE* 8 (5).  
562 doi:10.1371/journal.pone.0064638.
- 563 Moret, Yannick, and Paul Schmid-Hempel. 2000. “Survival for Immunity: The Price of Immune  
564 System Activation for Bumblebee Workers.” *Science* 290 (5494): 1166–68.  
565 doi:10.1126/science.290.5494.1166.
- 566 Moret, Yannick, and Michael T Siva-Jothy. 2003. “Adaptive Innate Immunity? Responsive-Mode  
567 Prophylaxis in the Mealworm Beetle, *Tenebrio Molitor*.” *Proceedings of the Royal Society B:*  
568 *Biological Sciences* 270 (1532): 2475–80. doi:10.1098/rspb.2003.2511.
- 569 Netea, Mihai G., Jessica Quintin, and Jos W.M. van der Meer. 2011. “Trained Immunity: A Memory  
570 for Innate Host Defense.” *Cell Host & Microbe* 9 (5): 355–61. doi:10.1016/j.chom.2011.04.006.
- 571 Norouzitallab, Parisa, Priyanka Biswas, Kartik Baruah, and Peter Bossier. 2015. “Multigenerational  
572 Immune Priming in an Invertebrate Parthenogenetic *Artemia* to a Pathogenic *Vibrio*  
573 *Campbellii*.” *Fish & Shellfish Immunology* 42 (2): 426–29. doi:10.1016/J.FSI.2014.11.029.
- 574 Pardo-López, Liliana, Mario Soberón, and Alejandra Bravo. 2013. “*Bacillus Thuringiensis*  
575 Insecticidal Three-Domain Cry Toxins: Mode of Action, Insect Resistance and Consequences  
576 for Crop Protection.” *FEMS Microbiology Reviews* 37 (1): 3–22. doi:10.1111/j.1574-  
577 6976.2012.00341.x.

- 578 Pham, Linh N, Marc S Dionne, Mimi Shirasu-Hiza, and David S Schneider. 2007. “A Specific  
579 Primed Immune Response in *Drosophila* Is Dependent on Phagocytes.” *PLoS Pathogens* 3 (3):  
580 e26. doi:10.1371/journal.ppat.0030026.
- 581 Pradeu, Thomas, and Louis Du Pasquier. 2018. “Immunological Memory: What’s in a Name?”  
582 *Immunological Reviews* 283 (1): 7–20. doi:10.1111/imr.12652.
- 583 R Development Core Team. 2008. “R: A Language and Environment for Statistical Computing.”  
584 Vienna, Austria: R Foundation for Statistical Computing. <http://www.r-project.org>.
- 585 Rechavi, Oded, Gregory Minevich, and Oliver Hobert. 2011. “Transgenerational Inheritance of an  
586 Acquired Small RNA-Based Antiviral Response in *C. Elegans*.” *Cell* 147 (6): 1248–56.  
587 doi:10.1016/j.cell.2011.10.042.
- 588 Roth, Olivia, Anne Beemelmans, Seth M. Barribeau, and Ben M. Sadd. 2018. “Recent Advances in  
589 Vertebrate and Invertebrate Transgenerational Immunity in the Light of Ecology and  
590 Evolution.” *Heredity* 121 (3): 225–38. doi:10.1038/s41437-018-0101-2.
- 591 Roth, Olivia, Gerrit Joop, Hendrik Eggert, Jonas Hilbert, Jens Daniel, Paul Schmid-Hempel, and  
592 Joachim Kurtz. 2010. “Paternally Derived Immune Priming for Offspring in the Red Flour  
593 Beetle, *Tribolium Castaneum*.” *Journal of Animal Ecology* 79 (2): 403–13. doi:10.1111/j.1365-  
594 2656.2009.01617.x.
- 595 Roth, Olivia, Ben M Sadd, Paul Schmid-Hempel, and Joachim Kurtz. 2009. “Strain-Specific Priming  
596 of Resistance in the Red Flour Beetle, *Tribolium Castaneum*.” *Proceedings of the Royal Society*  
597 *B: Biological Sciences* 276 (1654): 145–51. doi:10.1098/rspb.2008.1157.
- 598 RStudio Team. 2015. “R-Studio: Integrated Development for R.” <https://www.rstudio.com/>.
- 599 Sadd, Ben M, and Paul Schmid-Hempel. 2009. “A Distinct Infection Cost Associated with Trans-  
600 Generational Priming of Antibacterial Immunity in Bumble-Bees.” *Biology Letters* 5 (6): 798–  
601 801. doi:10.1098/rsbl.2009.0458.
- 602 Salmela, Heli, Gro V. Amdam, and Dalial Freitak. 2015. “Transfer of Immunity from Mother to  
603 Offspring Is Mediated via Egg-Yolk Protein Vitellogenin.” *PLOS Pathogens* 11 (7): e1005015.  
604 doi:10.1371/journal.ppat.1005015.
- 605 Schmid-Hempel, Paul. 2005. “Evolutionary Ecology of Insect Immune Defenses.” *Annual Review of*  
606 *Entomology* 50 (1): 529–51. doi:10.1146/annurev.ento.50.071803.130420.
- 607 Tate, Ann T. 2017. “A General Model for the Influence of Immune Priming on Disease Prevalence.”  
608 *Oikos* 126 (3): 350–60. doi:10.1111/oik.03274.
- 609 Tate, Ann T., Peter Andolfatto, Jeffery P. Demuth, and Andrea L. Graham. 2017. “The Within-Host  
610 Dynamics of Infection in Trans-Generationally Primed Flour Beetles.” *Molecular Ecology* 26  
611 (14): 3794–3807. doi:10.1111/mec.14088.
- 612 Therneau, Terry M., and Patricia M. Grambsch. 2000. *Modeling Survival Data : Extending the Cox*  
613 *Model*. Springer. <http://www2.uaem.mx/r-mirror/web/packages/survival/citation.html>.

- 614 Thomas, Ann M., and Volker H. W. Rudolf. 2010. “Challenges of Metamorphosis in Invertebrate  
615 Hosts: Maintaining Parasite Resistance across Life-History Stages.” *Ecological Entomology* 35  
616 (2): 200–205. doi:10.1111/j.1365-2311.2009.01169.x.
- 617 Tidbury, Hannah J, Alex Best, and Mike Boots. 2012. “The Epidemiological Consequences of  
618 Immune Priming.” *Proceedings of the Royal Society B: Biological Sciences* 279 (1746): 4505–  
619 12. doi:10.1098/rspb.2012.1841.
- 620 Tidbury, Hannah J, Amy B Pedersen, and Mike Boots. 2011. “Within and Transgenerational Immune  
621 Priming in an Insect to a DNA Virus.” *Proceedings of the Royal Society B: Biological Sciences*  
622 278 (1707): 871–76. doi:10.1098/rspb.2010.1517.
- 623 Vantaux, Amélie, Kounbobr Dabiré, Anna Cohuet, and Thierry Lefèvre. 2014. “A Heavy Legacy:  
624 Offspring of Malaria-Infected Mosquitoes Show Reduced Disease Resistance.” *Malaria Journal*  
625 13 (1): 442. doi:10.1186/1475-2875-13-442.
- 626 Venables, W. N., and B. D. Ripley. 2002. *Modern Applied Statistics with S*. 4th ed. Statistics and  
627 Computing. New York, NY: Springer New York. doi:10.1007/978-0-387-21706-2.
- 628 Vilcinskis, Andreas. 2016. “The Role of Epigenetics in Host–parasite Coevolution: Lessons from the  
629 Model Host Insects *Galleria Mellonella* and *Tribolium Castaneum*.” *Zoology* 119 (4): 273–80.  
630 doi:10.1016/j.zool.2016.05.004.
- 631 Wojda, Iwona, and Paulina Taszłow. 2013. “Heat Shock Affects Host–pathogen Interaction in  
632 *Galleria Mellonella* Infected with *Bacillus Thuringiensis*.” *Journal of Insect Physiology* 59 (9):  
633 894–905. doi:10.1016/j.jinsphys.2013.06.011.
- 634 Zanchi, Caroline, Jean-Philippe Troussard, Guillaume Martinaud, Jérôme Moreau, and Yannick  
635 Moret. 2011. “Differential Expression and Costs between Maternally and Paternally Derived  
636 Immune Priming for Offspring in an Insect.” *Journal of Animal Ecology* 80 (6): 1174–83.  
637 doi:10.1111/j.1365-2656.2011.01872.x.

638

## 639 **10 Data Availability Statement**

640 The datasets generated for this study can be found in the supplementary material.

641

## 642 **11 Figures**



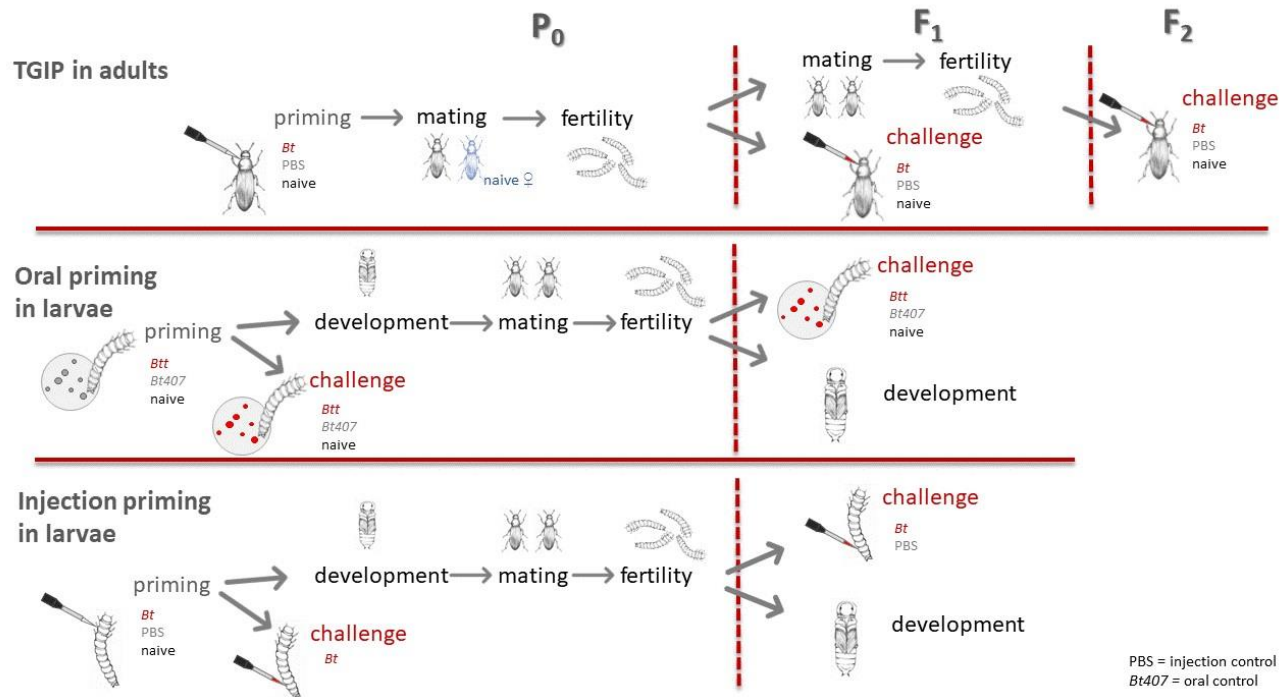

643

644 **Figure 1 Overview of the experimental design**

645

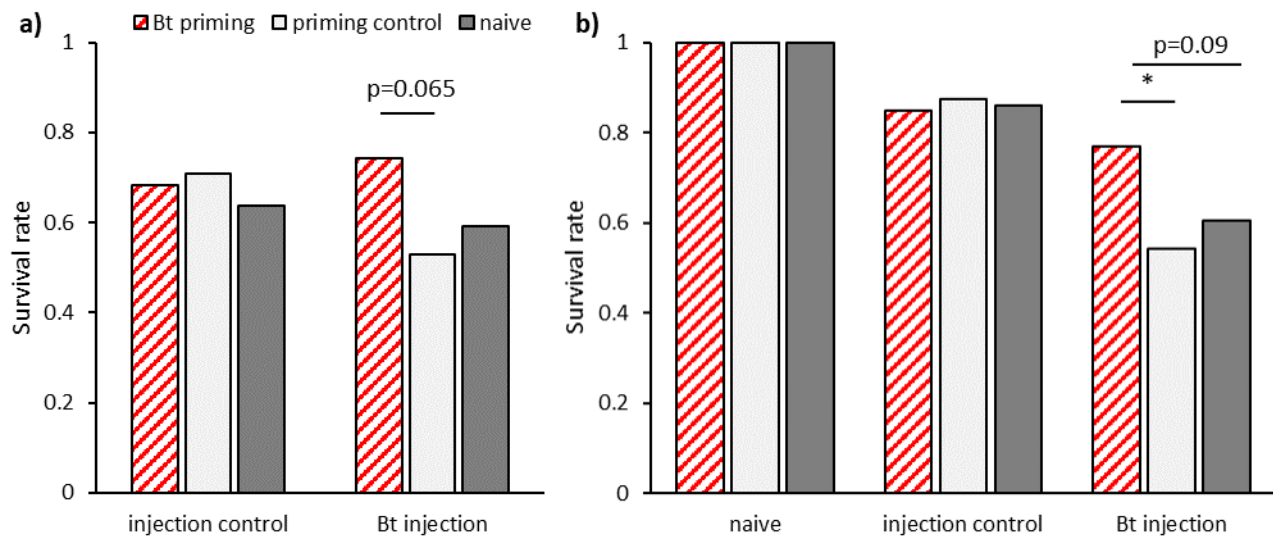

646

647 **Figure 2: Survival of bacterial challenge after paternal TGIP. a) Adult F1 generation after**  
 648 **parental priming (n=31-44) and b) adult F2 generation after grandparental priming (two**  
 649 **experimental blocks: n=16-42 and n=24-45). Asterisks indicate significant differences at  $p < 0.05$ .**  
 650

651

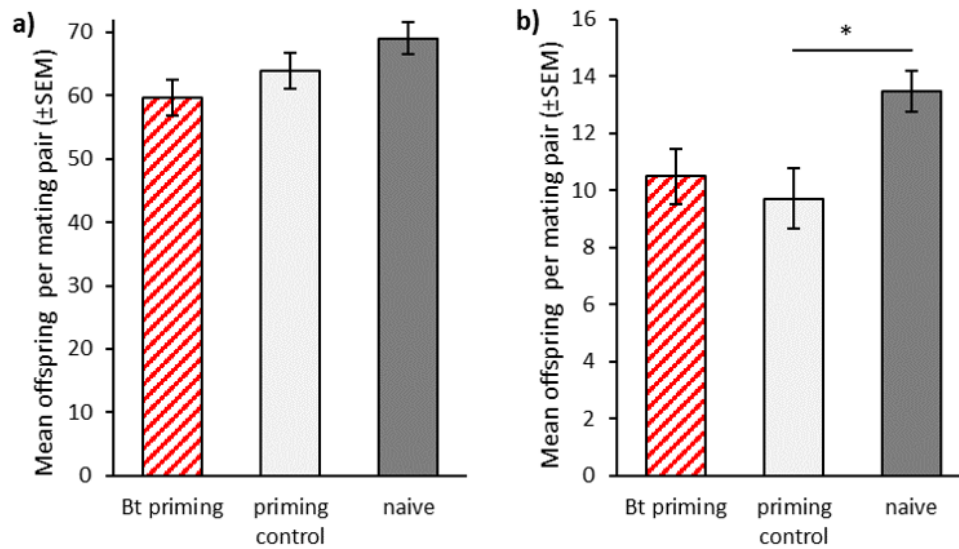

652

653 **Figure 3: Male fertility after injection priming of adults. a) Mean offspring produced by**  
654 **primed males within 6 days (n=39-57) and b) mean offspring produced by offspring of primed**  
655 **males within 48 h (n=29-53). Asterisk indicates significant differences at p < 0.05**

656

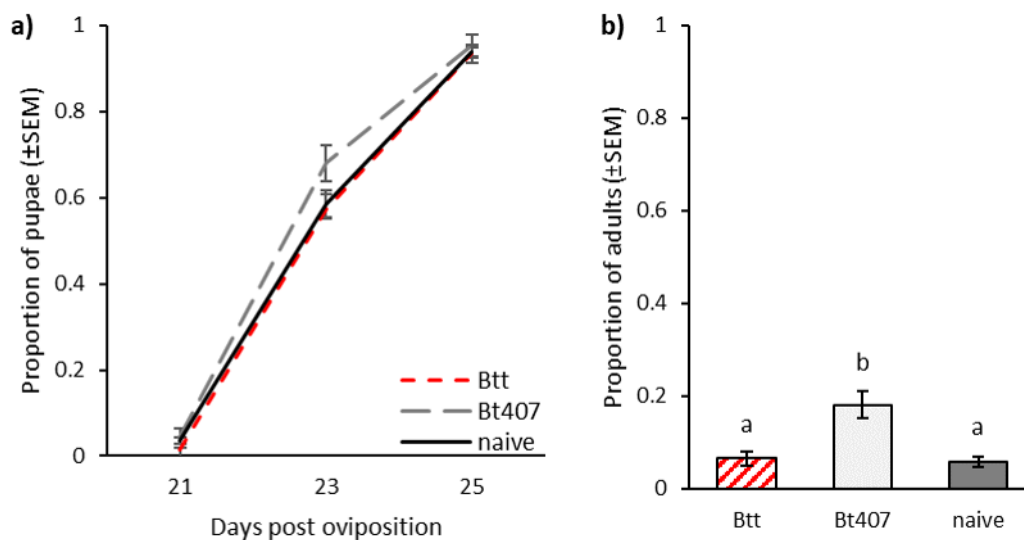

657

658 **Figure 4 Development after oral priming during larval stage (n=196-280). a) Pupation rate for**  
659 **nine replicates b) Proportion of eclosed adults 28 dpo for nine replicates. Different letters**  
660 **indicate significant differences at p<0.05**

661

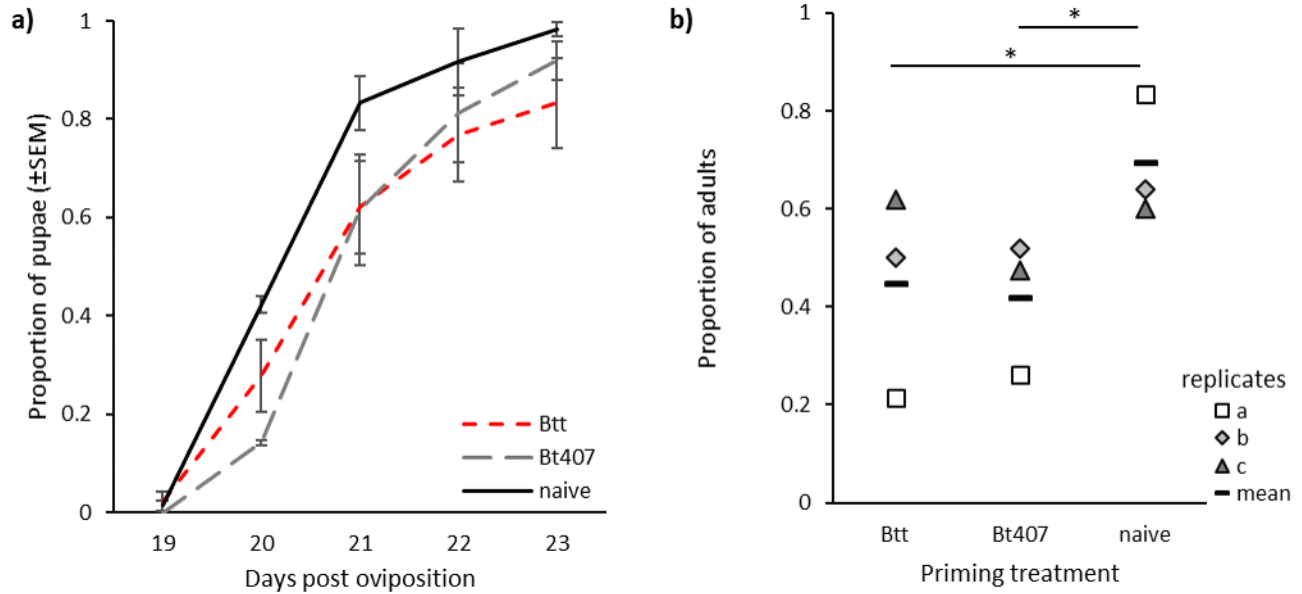

662

663 **Figure 5: Offspring development after parental oral priming during the larval stage (n=70-75).**  
 664 **a) Pupation rate b) Proportion of eclosed adults 28 dpo for three replicates. Asterisks indicate**  
 665 **significant differences at  $p < 0.05$**

666

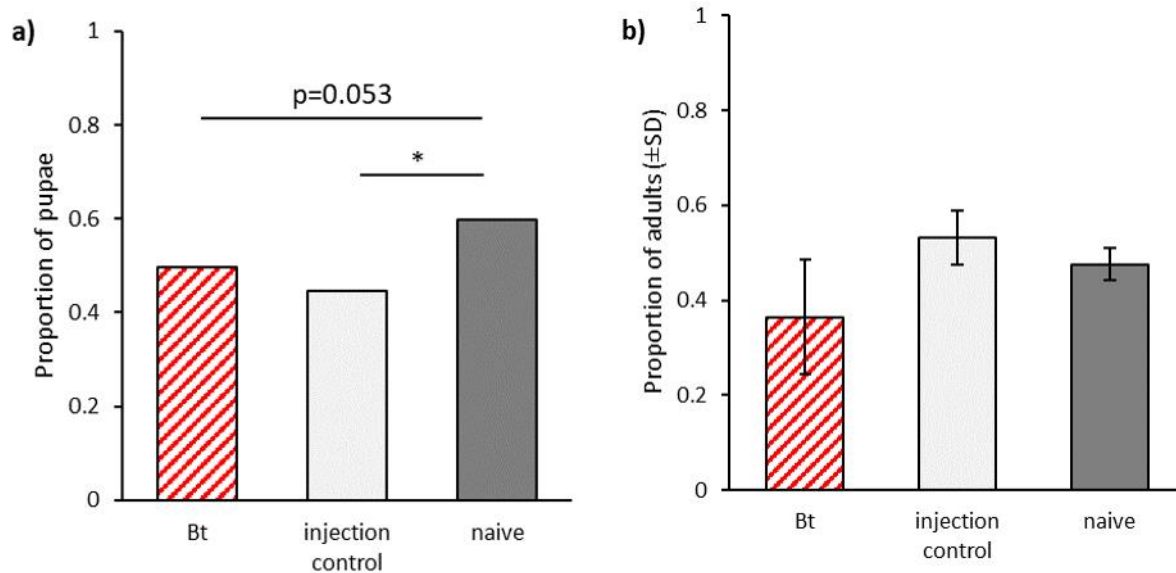

667

668 **Figure 6: Development after parental injection priming during the larval stage. a) Proportion**  
 669 **of pupae for P<sub>0</sub> 23 dpo (n=196). b) Proportion of eclosed adults for F<sub>1</sub> 27 dpo for two**  
 670 **experimental blocks (n=72-103). Asterisks indicate significant differences at  $p < 0.05$ .**
